# Supplementary material for: Flexible quantum dot–PVA composites for white LEDs
Source: Royal Society of Chemistry journal article supplement (doi:10.1039/c4tc02256d), 2014-11-19
Supplement: c4tc02256d1.pdf [file c4tc02256d1.pdf]

## Supporting Information

### Flexible quantum dot-PVA composites for white LEDs

Arzu Coşgun,<sup>1,2</sup> Renli Fu,<sup>1\*</sup> Weina Jiang,<sup>1</sup> Jianhai Li,<sup>2</sup> Jizhong Song,<sup>2</sup> Xiufeng Song,<sup>2</sup> and  
Haibo Zeng<sup>2\*</sup>

<sup>1</sup>State Key Laboratory of Mechanics and Control of Mechanical Structures & College of Materials Science and Technology, Nanjing University of Aeronautics and Astronautics, Nanjing 210016, China

<sup>2</sup>Institute of Optoelectronics & Nanomaterials (IONS), College of Materials Science and Engineering, Nanjing University of Science and Technology, Nanjing 210094, China

\*Corresponding Emails: zeng.haibo.nano@gmail.com (H. Z.); rlfu@nuaa.edu.cn (R. F.)

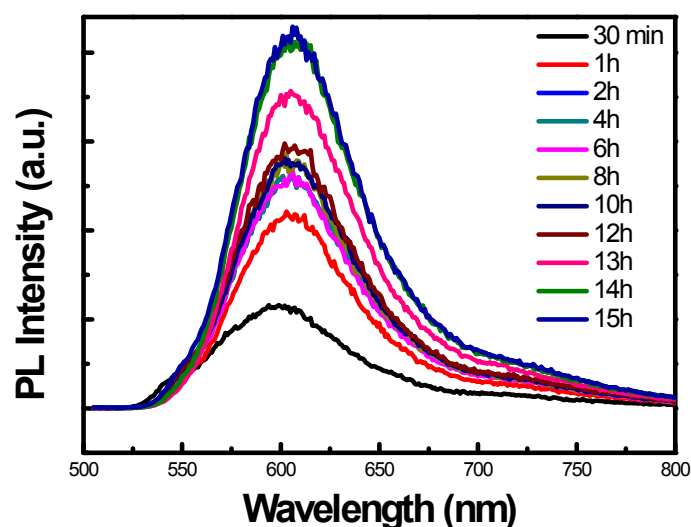

**Figure S1.** Temporal evolution of the PL spectra of ZnSe:Mn@MPA nanocrystals

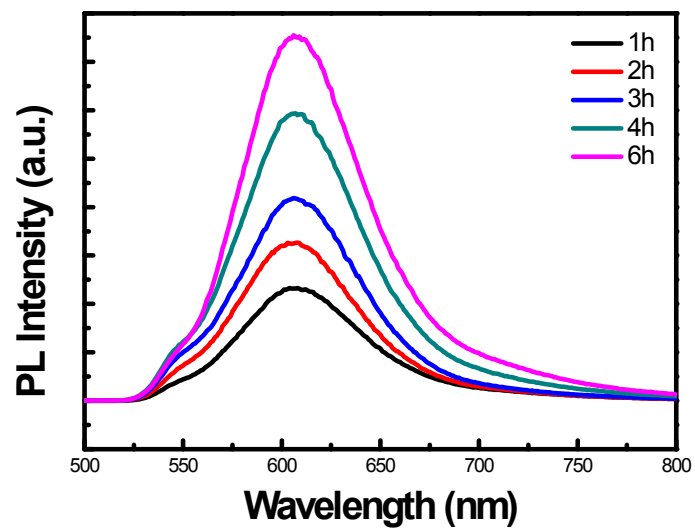

**Figure S2.** Temporal evolution of the PL spectra during the overcoating of ZnSe:Mn QDs with the ZnS shell.

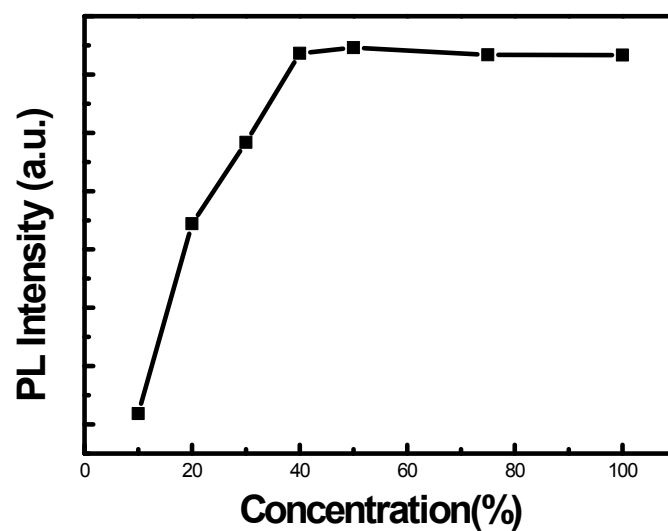

**Figure S3.** PL Intensity of ZnSe:Mn/ZnSQDs/PVA according to different concentration ratios.

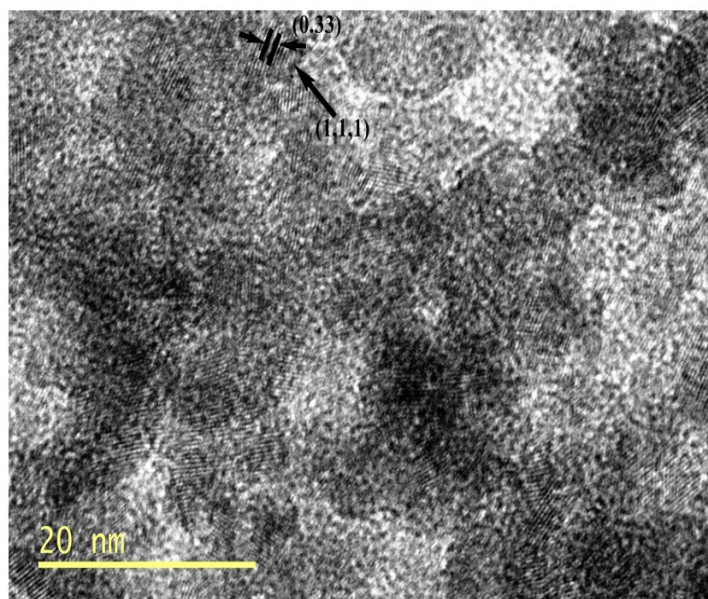

**Figure S4.** TEM images of the ZnSe:Mn core NCs.

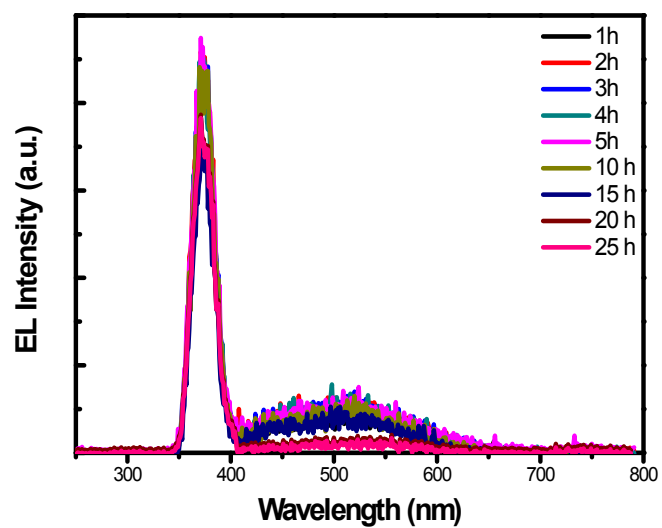

**Figure S5.** Temporal evolution of EL spectra of QDs-PVA composite without silica coating.

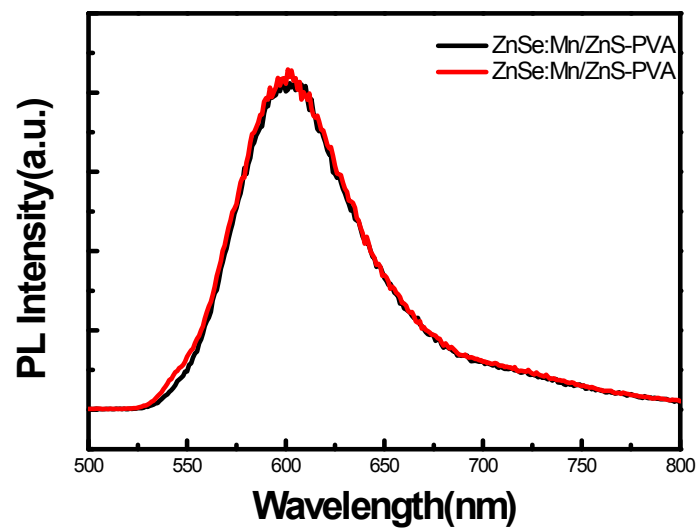

**Figure S6.** PL spectra of fresh synthesized ZnSe:Mn/ZnS-PVA (red) and after the 9 month later sample (black).

| Name of the Article                                                                                                                                     | Quantum Yield (QY) value |
|---------------------------------------------------------------------------------------------------------------------------------------------------------|--------------------------|
| A. Aboulaich, L. Balan, J. Ghanbaja, G. Medjahdi, C. Merlin, R. Schneider, <i>Chem. Mater.</i> , 2011, <b>23</b> , 3706 – 3713.                         | 12%.                     |
| Wang C, Gao X, Ma Q, Xu X, <i>J. Mater. Chem.</i> , 2009, <b>19</b> , 7016.                                                                             | 2,4%                     |
| P. Shao, Q. Zhang, Y. Li, H. Wang, <i>J. Mater. Chem.</i> 2011, <b>21</b> , 151.                                                                        | 4.8%,                    |
| F. Zheng, W. Ping, Z. Xinhua, Y. Yong-Ji, <i>Nanotechnology</i> , 2010, <b>21</b> , 305604.                                                             | 30-35%                   |
| X. Tongtong, W. Song, W. Xiaojun, L. Jiaqing, C. Jiyao, L. Huili, P. Likun, S. Zhuo, <i>Chem. Commun.</i> , 2013, <b>49</b> , 9045-9047.                | 21.86%                   |
| M. Geszke, M. Murias, L. Balan, G. Medjahdi, J. Korczynski, M. Moritz, J. Lulek, R. Schneider, <i>Acta Biomaterialia.</i> , 2011, <b>7</b> , 1327–1338. | 22%                      |
| R. Ban, J. Li, J. Cao, P. Zhang, J. Zhang, J. Zhu, <i>Anal. Methods</i> , 2013, <b>5</b> , 5929.                                                        | 27.4%                    |
| B. Luong, E. Hyeong, S. Yoon, J. Choi, N. Kim, <i>RSC Adv.</i> , 2013, <b>3</b> , 23395.                                                                | 27.6%                    |
| J. Zheng, X. Yuan, M. Ikezawa, P. Jing, X. Liu, Z. Zheng, X. Kong, J. Zhao, Y. Masumoto, <i>J. Phys. Chem. C.</i> , 2009, <b>113</b> , 16969–16974.     | 35%                      |
| J. Ke, X. Li, Q. Zhao, Y. Hou, J. Chen, <i>Water. Sci. Rep.</i> , 2014, <b>4</b> , 5624;                                                                | 25%                      |
| D. Zhu, X. Jiang, C. Zhao, X. Sun, J. Zhang, J. Zhu, <i>Chem. Commun.</i> , 2010, <b>46</b> , 5226–5228.                                                | 25%                      |
| H. Zhang, X. Gao, S. Liu, X. Su, <i>J. Nanopart. Res.</i> , 2013, <b>15</b> , 1749.                                                                     | 4.8 %                    |
| B. Dong, L. Cao, G. Su, W. Liu, <i>J. Phys. Chem. C</i> , 2012, <b>116</b> , 12258 – 12264.                                                             | 24.0%                    |
| A. Aboulaich, M. Geszke, L. Balan, J. Ghanbaja, G. Medjahdi, R. Schneider, <i>Inorg. Chem.</i> , 2010, <b>49</b> , 10940.                               | 9%                       |

Table 1. Quantum yield (QY) values of Mn:ZnSe d-dots prepared in aqueous media.
